# Supplementary material for: Peripheral and Central Iron Measures in Alcohol Use Disorder and Aging: A Quantitative Susceptibility Mapping Pilot Study
Source: MDPI journal article supplement (doi:10.3390/ijms24054461), 2023-02-24
Supplement: s1 [file s1]

## Peripheral and Central Iron Measures in Alcohol Use Disorder and Aging: A Quantitative Susceptibility Mapping Pilot Study

Aiden R. Adams <sup>1</sup>, Xinyi Li <sup>1</sup>, Juliana I. Byanyima <sup>1</sup>, Sianneh A. Vesslee <sup>1</sup>, Thanh D. Nguyen <sup>2</sup>, Yi Wang <sup>2</sup>, Brianna Moon <sup>3</sup>, Timothy Pond <sup>1</sup>, Henry R. Kranzler <sup>1</sup>, Walter R. Witschey <sup>3</sup>, Zhenhao Shi <sup>1,†</sup> and Corinde E. Wiers <sup>1,3,†,\*</sup>

<sup>1</sup> Center for Studies of Addiction, Department of Psychiatry, Perelman School of Medicine, University of Pennsylvania, 3535 Market St Ste 500, Philadelphia, PA 19104, USA;

<sup>2</sup> Department of Radiology, Weill Cornell Medicine, 525 E 68th St, New York, NY 10065, USA;

<sup>3</sup> Department of Radiology, Perelman School of Medicine, University of Pennsylvania, 3400 Civic Center Blvd, South Pavilion, Room 11-155, Philadelphia, PA 19104, USA;

\* Correspondence: corinde.wiers@pennmedicine.upenn.edu; Tel.: +1-215-746-1898

† These authors contributed equally to this work.

### Supplementary Material

**Table S1.** Summary of regression analysis for serum ferritin from the National Institutes of Health (NIH) sample in n=583 inpatients with AUD and n=470 healthy controls

| Serum Ferritin (NIH)  |                 |             |                  |
|-----------------------|-----------------|-------------|------------------|
| <i>Variable</i>       | <i>B</i>        | <i>SE B</i> | <i>β</i>         |
| AUD                   | 123.7           | 15.05       | <b>0.256***</b>  |
| Age                   | 1.476           | 0.566       | <b>0.080**</b>   |
| BMI                   | -3.250          | 1.406       | <b>-0.068*</b>   |
| Sex                   | -108.4          | 14.48       | <b>-0.221***</b> |
| CRP                   | 2.166           | 0.092       | <b>0.092**</b>   |
| <i>R</i> <sup>2</sup> | 0.173           |             |                  |
| <i>F</i>              | <b>42.70***</b> |             |                  |

Abbreviations: AUD alcohol use disorder, BMI body mass index, SE standard error. CRP C-reactive protein. Dummy coding: AUD (1=AUD, 0=healthy control); sex (1=female, 0=male).

\*p<0.05, \*\*p<0.01, \*\*\*p<0.001

**Table S2.** Summary of regression analysis for serum ferritin from the University of Pennsylvania (Penn) sample in n=10 participants with AUD and n=8 healthy controls

| Serum Ferritin (Penn) |               |             |               |
|-----------------------|---------------|-------------|---------------|
| <i>Variable</i>       | <i>B</i>      | <i>SE B</i> | <i>β</i>      |
| AUD                   | 67.28         | 31.12       | <b>0.523*</b> |
| Age                   | -1.661        | 1.063       | -0.325        |
| BMI                   | 0.562         | 3.493       | 0.040         |
| Sex                   | -31.91        | 28.67       | -0.243        |
| <i>R</i> <sup>2</sup> | 0.474         |             |               |
| <i>F</i>              | <b>2.934^</b> |             |               |

Abbreviations: AUD alcohol use disorder, BMI body mass index, SE standard error. Dummy coding: AUD (1=AUD, 0=healthy control); sex (1=female, 0=male).

^p<0.06, \*p<0.05

**Table S3.** Iron panel results (mean and standard deviation) from the University of Pennsylvania (Penn) sample

| Characteristics | AUD (n=10)   | HC (n=8)     | <i>p</i> value |
|-----------------|--------------|--------------|----------------|
| Ferritin        | 119.4 (67.4) | 51.0 (41.0)  | 0.023          |
| TIBC            | 316.0 (23.0) | 324.3 (69.8) | 0.37           |
| UIBC            | 193.6 (54.9) | 227.1 (90.4) | 0.35           |
| Iron            | 122.4 (39.6) | 97.1 (56.3)  | 0.28           |
| Iron Saturation | 38.4 (15.5)  | 31.4 (18.4)  | 0.39           |
| Transferrin     | 266.5 (24.5) | 267.7 (55.5) | 0.95           |

Abbreviations: AUD alcohol use disorder, TIBC Total iron-binding capacity, UIBC unsaturated iron-binding capacity

While our QSM study was underpowered to perform a genetic analysis of *HFE*, we analyzed the effects of *HFE* rs1799945 genotype on serum ferritin and its interaction with AUD status in the NIH sample (n= 484 AUD and n=431 controls for whom genetic data were available), as per Kroll et al, 2022 [7]. *HFE* SNP rs1799945 was determined using the Illumina human OmniExpressExome array (Illumina, San Diego, CA, USA). To correct for genetic ancestry, a principal component analysis (PCA) was performed based on 133,486 SNPs using the -CPA option in PLINK 1.9 <https://www.cog-genomics.org/plink/1.9/strat#pca> (cut-offs: minor allele frequency  $\geq 0.01$ , Hardy Weinberg Equilibrium  $p \geq 1 \times 10^{-6}$ , pairwise SNPs  $r^2 \leq 0.2$  in a 50kb window). The first 3 ancestry principal components (PCs) were used to correct for ancestry in the statistical model.

A linear regression model with ferritin as dependent variable with AUD and *HFE* (i.e., H63D-carriers vs wild-type) as predictor and age, BMI, sex, and ancestry PCs as covariates demonstrated a main effect of AUD on serum ferritin ( $F_{1,915}=48.5$ ,  $p<0.0001$ ). There was not a significant main effect of rs1799945 genotype ( $F_{1,915}=0.35$ ,  $p=0.56$ ) or an interaction effect of rs1799945 x AUD status on serum ferritin levels ( $F_{1,915}=2.53$ ,  $p=0.112$ ).
